# Supplementary material for: A Cross-Sectional, Questionnaire-Based Study on Drug Treatment Awareness in Schizophrenia Patients and Caregivers: An Unexplored Avenue
Source: PubMed Central journal article supplement — Indian J Psychol Med. 2021 Dec 21;44(2):137–44. doi: 10.1177/02537176211056358 (PMC9120996; doi:10.1177/02537176211056358), 2021-12-21
Supplement: ANNEXURE.pdf [file ANNEXURE.pdf]

**Annexure I. Questionnaire For Awareness of Drug Treatment in Patients with Schizophrenia**

Patient's initials:

Age:

Gender:

Study ID:

OPD No:

Date:

Please answer the following questions by ticking one option.

**1. Current Prescription Domain:**

i. Do you know about the medicines that have been written on the prescription today? (a) Yes (b) No (c) Cannot say (d) Refuse to answer

If yes,

State the number of medicines: \_\_\_\_\_

Response correct/incorrect as evaluated by the investigator. If incorrect, state the discrepancy :

Name the medicines:

- 1.
- 2.
- 3.
- 4.

Response correct/ incorrect as evaluated by the investigator. If incorrect, state the discrepancy :

ii. Do you know the dosing frequency of medicines prescribed to you today? (a) Yes (b) No (c) Cannot say (d) Refuse to answer

If yes,

State the dosing frequency of each medication:

- Drug 1:  
Drug 2:  
Drug 3:  
Drug 4:

Response correct/ incorrect as evaluated by the investigator. If incorrect, state the discrepancy:

iii) Do you know the reason for which you have been given each of these medicines? (a) Yes (b) No (c) Cannot say (d) Refuse to answer

If yes, state the reasons

- Drug 1:  
Drug 2:  
Drug 3:  
Drug 4:

Response correct/ incorrect as evaluated by the investigator. If incorrect, state the discrepancy:

**2. Influence of Disease Severity, Concomitant Disease/Drug Awareness:**

iv. Do drugs and their doses depend on:

- |                                  |                                                    |
|----------------------------------|----------------------------------------------------|
| Severity of disease              | (a) Yes (b) No (c) Cannot say (d) Refuse to answer |
| Response to treatment            | (a) Yes (b) No (c) Cannot say (d) Refuse to answer |
| Presence of other illnesses      | (a) Yes (b) No (c) Cannot say (d) Refuse to answer |
| Intake of concurrent medications | (a) Yes (b) No (c) Cannot say (d) Refuse to answer |

**3. Drug Compliance Awareness:**

v. Is it important to follow a dosing schedule? (a) Yes (b) No (c) Cannot say (d) Refuse to answer

vi. Do you skip your medication dose often? (a) Yes (b) No (c) Cannot say (d) Refuse to answer

If yes,

State the reason for skipping medicine dose :

\_\_\_\_\_

vii. Do you know what to do if you skip a medication dose? (a) Yes (b) No (c) Cannot say (d) Refuse to answer

If yes, state:

\_\_\_\_\_

Response correct/ incorrect as evaluated by the investigator. If incorrect, state the discrepancy :

viii. Have you ever stopped taking medicines for your illness on a continuous basis (for more than 3 days) against the doctor's advice? (a) Yes (b) No (c) Cannot say (d) Refuse to answer

If yes,

State the reason for stopping medications:

\_\_\_\_\_

**4. Past Medication Record Awareness:**

ix. Do you maintain a record of the past medication prescriptions? (a) Yes (b) No (c) Cannot say (d) Refuse to answer

Response correct/ incorrect as evaluated by the investigator. If incorrect, state the discrepancy :

**5. Re-visit/Re-Contact Instruction Awareness:**

x. Do you know when is your next follow up? (a) Yes (b) No (c) Cannot say (d) Refuse to answer

If yes, state:

\_\_\_\_\_

Response correct/ incorrect as evaluated by the investigator. If incorrect, state the discrepancy :

xi. Is it important to keep a regular follow-up with the consulting physician? (a) Yes (b) No (c) Cannot say (d) Refuse to answer

xii. Is it important to consult your doctor before taking any concurrent medications? (a) Yes (b) No (c) Cannot say (d) Refuse to answer

**6. Side Effects Awareness:**

xiii. Can drugs given to you cause undesired effects (side effects)? (a) Yes (b) No (c) Cannot say (d) Refuse to answer

If yes, please tick the side effect that you are aware of:

|      |                                                                                        |
|------|----------------------------------------------------------------------------------------|
|      | Headache                                                                               |
|      | Difficulty in falling asleep/ Increased duration of sleep/ Decreased duration of sleep |
|      | Skin rash/ Itching                                                                     |
|      | Dry mouth                                                                              |
|      | Blurred vision                                                                         |
|      | Urination difficulty                                                                   |
|      | Constipation                                                                           |
|      | Vomiting                                                                               |
|      | Uncontrolled movements in eyes/tongue/jaw/neck                                         |
|      | Tremors                                                                                |
|      | Restlessness or jitteriness                                                            |
|      | Muscle stiffness                                                                       |
|      | Fever                                                                                  |
|      | Sweating                                                                               |
|      | Increase in breast size                                                                |
|      | Irregular menses                                                                       |
|      | Weight gain                                                                            |
|      | Drowsiness                                                                             |
|      | Difficulty in intercourse                                                              |
|      | Seizures                                                                               |
| xiv. | Palpitations                                                                           |
| If   | Yellow discoloration of skin and eyes                                                  |
| you  | Black tarry stools                                                                     |
|      | Breathing difficulty                                                                   |
|      | Stuffy nose                                                                            |
|      | Sore throat                                                                            |
|      | Unusual bleeding                                                                       |
|      | Confusion                                                                              |
|      | Muscle pain                                                                            |
|      | Weakness                                                                               |
|      | Appetite changes                                                                       |

experience side effects, will you report the side effects to your doctor? (a) Yes (b) No (c) Cannot say (d) Refuse to answer

xv. Do you know that you may need separate treatment to manage the (a) Yes (b) No (c) Cannot say (d) Refuse to answer

side effects?

**7. Long-term Treatment Awareness:**

xvi. Do you know that you may need to take medications for a long term? (a) Yes (b) No (c) Cannot say (d) Refuse to answer

**Annexure II. Questionnaire for Awareness of Drug Treatment in Caregivers of Patients with Schizophrenia**

Caregiver's initials:

Age:

Gender:

Relationship with the patient:

Study ID:

Date:

Please answer the following questions by ticking one option

**1. Current Prescription Domain:**

i. Do you know about the medicines that have been written on patient's prescription today? (a) Yes (b) No (c) Cannot say (d) Refuse to answer

If yes,

State the number of medicines: \_\_\_\_\_

Response correct/ incorrect as evaluated by the investigator. If incorrect, state the discrepancy :

Name the medicines:

- 1.
- 2.
- 3.
- 4.

Response correct/ incorrect as evaluated by the investigator. If incorrect, state the discrepancy :

ii. Do you know the reason for which patient has been given each of these medicines? (a) Yes (b) No (c) Cannot say (d) Refuse to answer

If yes, state the reasons

Drug 1:

Drug 2:

Drug 3:

Drug 4:

Response correct/ incorrect as evaluated by the investigator. If incorrect, state the discrepancy :

iii. Do you know the dosing frequency of medicines prescribed to the patient today ? (a) Yes (b) No (c) Cannot say (d) Refuse to answer

If yes,

State the dosing frequency of each medication:

Drug 1:

Drug 2:

Drug 3:

Drug 4:

Response correct/ incorrect as evaluated by the investigator. If incorrect, state the discrepancy:

## 2. Influence of Disease Severity, Concomitant Disease/Drug Awareness:

iv. Do drugs and their doses depend on:

Severity of disease (a) Yes (b) No (c) Cannot say (d) Refuse to answer

Response to treatment (a) Yes (b) No (c) Cannot say (d) Refuse to answer

Accompanying comorbid diseases (a) Yes (b) No (c) Cannot say (d) Refuse to answer

Intake of concurrent medications (a) Yes (b) No (c) Cannot say (d) Refuse to answer

## 3. Drug Compliance Awareness:

v. Is it important for the patient to follow a dosing schedule? (a) Yes (b) No (c) Cannot say (d) Refuse to answer

vi. Does the patient skip his medicine dose often? (a) Yes (b) No (c) Cannot say (d) Refuse to answer

If yes,

State the reason for skipping medicines :

---

vii. Do you know what to do if the patient skips a medication dose?

If yes, state:

---

Response correct/ incorrect as evaluated by the investigator. If incorrect, state the discrepancy :

viii. Has the patient ever stopped taking medicines for his illness on a continuous basis (for more than three days) against the doctors' advice? (a) Yes (b) No (c) Cannot say (d) Refuse to answer

If yes,

State the reason for stopping medications:

---

## 4. Past Medication Record Awareness:

ix. Is the record of the patient's past medication prescriptions maintained? (a) Yes (b) No (c) Cannot say (d) Refuse to answer

Response correct/ incorrect as evaluated by the investigator. If incorrect, state the discrepancy :

**5. Re-Visit/Re-Contact Instruction Awareness:**

x. Do you know when is the patient's next follow-up? (a) Yes (b) No (c) Cannot say (d) Refuse to answer

If yes, state : \_\_\_\_\_

Response correct/ incorrect as evaluated by the investigator. If incorrect, state the discrepancy :

xi. Is it important for the patient to keep a regular follow-up with the consulting physician? (a) Yes (b) No (c) Cannot say (d) Refuse to answer

xii. Is it important for the patient to consult doctor before taking any concurrent medications? (a) Yes (b) No (c) Cannot say (d) Refuse to answer

**6. Side Effects Awareness:**

xiii. Can drugs given to the patient cause undesired effects (side effects) ? (a) Yes (b) No (c) Cannot say (d) Refuse to answer

If yes, please tick the side effect that you are aware of :

|  |                                                                                        |
|--|----------------------------------------------------------------------------------------|
|  | Headache                                                                               |
|  | Difficulty in falling asleep/ Increased duration of sleep/ Decreased duration of sleep |
|  | Skin rash/ Itching                                                                     |
|  | Dry mouth                                                                              |
|  | Blurred vision                                                                         |
|  | Urination difficulty                                                                   |
|  | Constipation                                                                           |
|  | Vomiting                                                                               |
|  | Uncontrolled movements in eyes/ tongue/ jaw/ neck                                      |
|  | Tremors                                                                                |
|  | Restlessness or jitteriness                                                            |
|  | Muscle stiffness                                                                       |
|  | Fever                                                                                  |
|  | Sweating                                                                               |
|  | Increase in breast size                                                                |
|  | Irregular menses                                                                       |
|  | Weight gain                                                                            |
|  | Drowsiness                                                                             |
|  | Difficulty in intercourse                                                              |
|  | Seizures                                                                               |
|  | Palpitations                                                                           |
|  | Yellow discoloration of skin and eyes                                                  |
|  | Black tarry stools                                                                     |
|  | Breathing difficulty                                                                   |
|  | Stuffy nose                                                                            |
|  | Sore throat                                                                            |
|  | Unusual bleeding                                                                       |

|  |                  |
|--|------------------|
|  | Confusion        |
|  | Muscle pain      |
|  | Weakness         |
|  | Appetite changes |

xiv. If the patient experiences side effects, will you report the side effects to the doctor?

(a) Yes (b) No (c) Cannot say (d) Refuse to answer

xv. Do you know that patient may need separate treatment to manage the side effects?

(a) Yes (b) No (c) Cannot say (d) Refuse to answer

**7. Long-term Treatment Awareness:**

xvi. Do you know that patient may need to take medications for a long term?

(a) Yes (b) No (c) Cannot say (d) Refuse to answer
